# Supplementary material
Source: PubMed Central journal article supplement (PMC3811396)
Supplement: AAC.00805-13_zac010132184so1.pdf [file AAC.00805-13_zac010132184so1.pdf]

## Supplement

Table S1: Nucleotide sequence of codon-optimized HMGB2

|                                                                                                                                                                                                                                                                                                                                                                                                                                                                                                                                                                                                                                                                                                                           |
|---------------------------------------------------------------------------------------------------------------------------------------------------------------------------------------------------------------------------------------------------------------------------------------------------------------------------------------------------------------------------------------------------------------------------------------------------------------------------------------------------------------------------------------------------------------------------------------------------------------------------------------------------------------------------------------------------------------------------|
| Codon-optimized HMGB2                                                                                                                                                                                                                                                                                                                                                                                                                                                                                                                                                                                                                                                                                                     |
| <p>ATGGGGAAAGGCGACCCGAACAAACCGCGCGGTAAAATGTCGTCCTACGCGTTCT<br/> TTGTCCAAACGTGTCGTGAGGAACACAAAAAAAACACCCGGACTCTTCGGTGAAC<br/> TTGCGGAATTTAGCAAAAAGTGCTCTGAACGCTGGAAAACCATGAGTGCAAAAGAG<br/> AAAAGCAAATTTGAAGATATGGCGAAAAGCGATAAAGCCCGTTATGATCGCGAAAT<br/> GAAGAACTACGTTCCACCGAAAGGGGACAAGAAAGGCCAAAAAAAAGACCCGAAT<br/> GCTCCCAAACGTCCTCCATCAGCCTTCTTCCTGTTTTGCAGTGAACATCGCCCGAAAA<br/> TCAAAGCGAACATCCGGGCTTATCGATTGGCGATACTGCCAAGAAATTGGGAGAA<br/> ATGTGGTCAGAACAGAGTGCTAAGGACAACAGCCCTATGAACAGAAAGCGGCCAA<br/> ACTGAAAGAGAAGTACGAGAAAGATATTGCGGCTTATCGCGCAAAGGCCAAAAGC<br/> GAAGCAGGAAAGAAAGGTCCTGGTCGGCCAACCGGTTCCAAAAAGAAGAATGAA<br/> CCGGAGGATGAAGAAGAAGAAGGAAGAAGAGGATGAGGATGAGGAAGAAG<br/> AAGATGAGGACGAAGAATAA</p> |

Table S2: Forward and reverse primers used for quantitative real-time PCR and recombinant protein expression

|                             | Forward (5'-3')       | Reverse (5'-3')                                  |
|-----------------------------|-----------------------|--------------------------------------------------|
| HMGB2 real-time PCR         | TTACGTTCTCTCCCAAAGGTG | TCTTTGGCTGACTGCTCAGA                             |
| rec. expression HMGB2       | ATGGGGAAAGGCGACC      | TTATTCTTCGTCCTCATCTTCTTCT                        |
| rec. expression A-Box       | ATGGGGAAAGGCGACCCG    | TTAGTCCCCTTTCGGTGGAA                             |
| rec. expression B-Box       | GGGGACAAGAAAGGCCAAAA  | TTACCGACCAGGACCTTTCTT                            |
| rec. expression Acidic-tail | GCAGGAAAGAAAGGTCCTG   | AGTAACGGCCGCCAGTGT<br>(binds in vector sequence) |

Table S3: Calculated molecular weight and extinction coefficient of fusion-proteins and full-length HMGB2 (ExpASy Protparam tool)

|                        | MW (kDa) | Extinction coefficient |
|------------------------|----------|------------------------|
| HMGB2 (fusion-protein) | 37.43    | 21555                  |
| HMGB2 (full-length)    | 24.03    | 20065                  |

|                              |       |       |
|------------------------------|-------|-------|
| A-Box (fusion-protein)       | 23.21 | 11585 |
| B-Box (fusion-protein)       | 23.97 | 11460 |
| Acidic-tail (fusion-protein) | 18.01 | 1490* |

\* Peptide contains no Tryptophan residues, this could result in more than 10 % error in computed ext. coefficient

Table S4: Amino acid sequences of recombinant expressed proteins/peptides

| Name        | Amino acid sequence                                                                                                                                                                                                                               |
|-------------|---------------------------------------------------------------------------------------------------------------------------------------------------------------------------------------------------------------------------------------------------|
| HMGB2       | MGKGDPNKPR GKMSSYAFFV QTCREEHKKK HPDSSVNFAE<br>FSKKCSERWK TMSAKEKSKF EDMAKSDKAR YDREMKNYVP<br>PKGDKKGKKK DPNAPKRPPS AFFLCSEHR PKIKSEHPGL<br>SIGDTAKKLG EMWSEQSAKD KQPYEQKAAK LKEYEKDIA<br>AYRAKGKSEA GKKGPRPTG SKKKNEPEDE EEEEEEEDED<br>EEEEDEDEE |
| A-Box       | MGKGDPNKPR GKMSSYAFFV QTCREEHKKK HPDSSVNFAE<br>FSKKCSERWK TMSAKEKSKF EDMAKSDKAR YDREMKNYVP<br>PKG D                                                                                                                                               |
| B-Box       | GDKKGGKKKDP NAPKRPPSAF FLFCSEHRPK IKSEHPGLSI<br>GDTAKKLGEM WSEQSAKDKQ PYEQKAAKLLK EKEYEKDIAAY<br>RAKGKSEAGK KGPR                                                                                                                                  |
| Acidic-tail | AGKKGPRPT GSKKKNEPED EEEEEEEEDE DEEEEEDEDEE                                                                                                                                                                                                       |
